# Supplementary material for: Genomic analyses of rice bean landraces reveal adaptation and yield related loci to accelerate breeding
Source: PubMed Central journal article supplement (PMC9523027; doi:10.1038/s41467-022-33515-2), 2022-09-29
Supplement: 41467_2022_33515_MOESM1_ESM.pdf [file 41467_2022_33515_MOESM1_ESM.pdf]

**Genomic analyses of rice bean landraces reveal adaptation and yield  
related loci to accelerate breeding**

*Guan et al.*

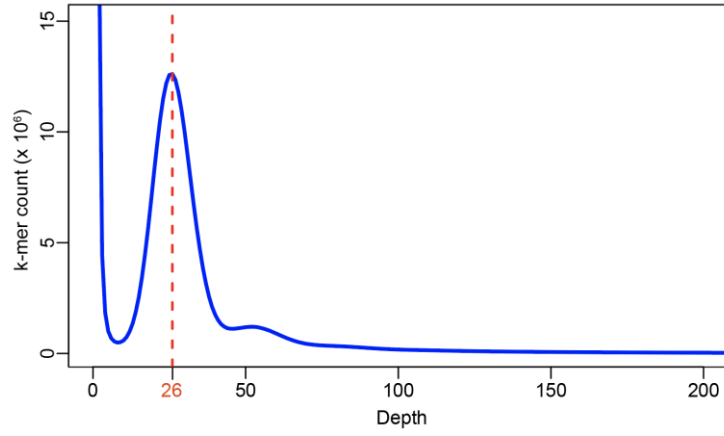

**Supplementary Fig. 1. 17-mer depth distribution of the Illumina short-reads.** The genome size of FF25 was 525.60 Mb, which was estimated based on the distribution of k-mer frequency and optimized using GCE v1.0.2.

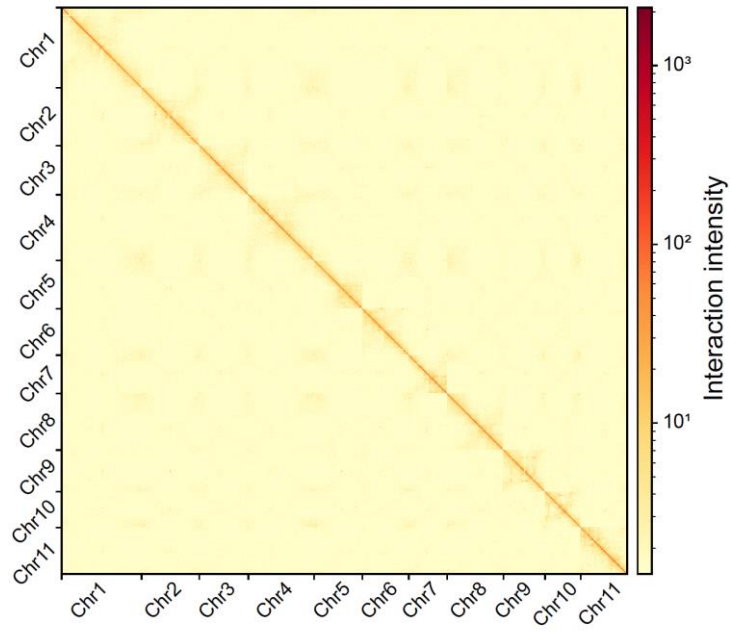

**Supplementary Fig. 2. Genome-wide ICE (iterative correction and eigenvector decomposition)-corrected Hi-C interaction heatmaps at 40 Kb windows for the genome assembly.** The diagonal lines represent the frequency of contact between two 40 Kb windows on a chromosome.

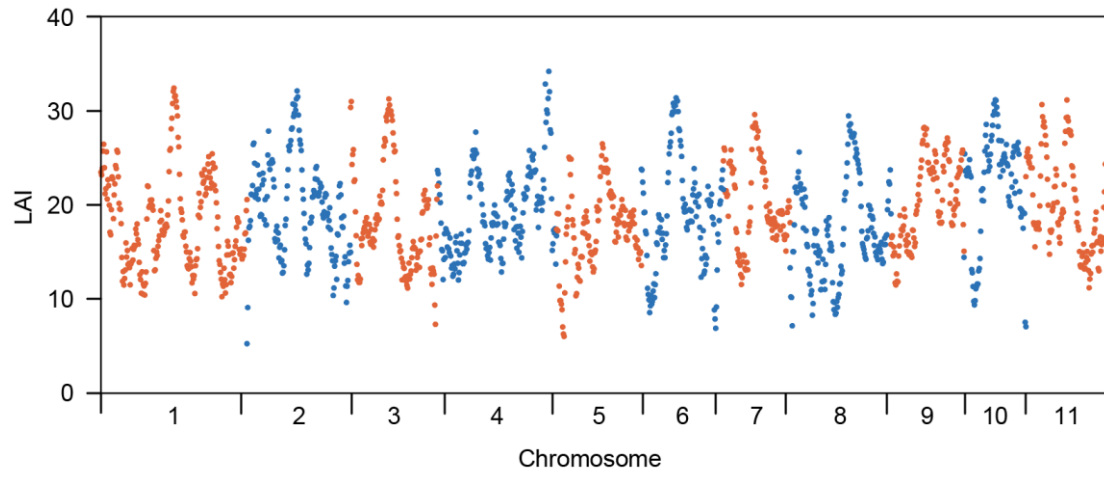

**Supplementary Fig. 3. Genome-wide distribution of LAI (LTR Assembly Index) scores in 3Mb windows.**

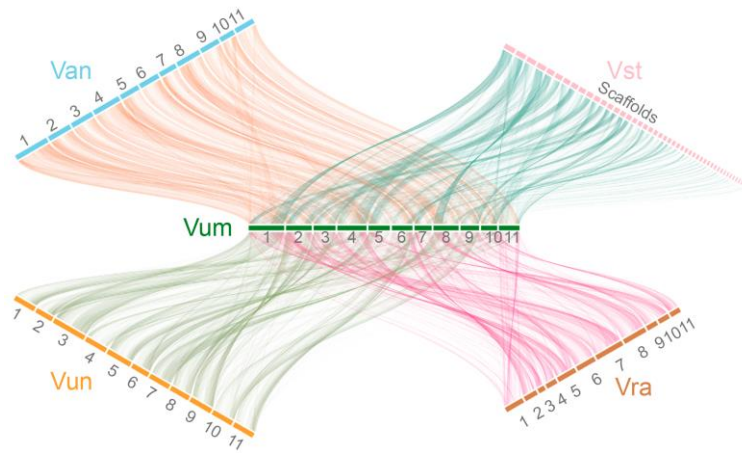

**Supplementary Fig. 4. Syntenic genes between *Vigna umbellata* (Vum) and its closely related *Vigna* species (*V. unguiculata* (Vun), *V. angularis* (Van), *V. radiata* (Vra), and *V. stipulacea* (Vst)).** Note that the Vst genome only shows the top 47 longest scaffolds (> 1 Mb).

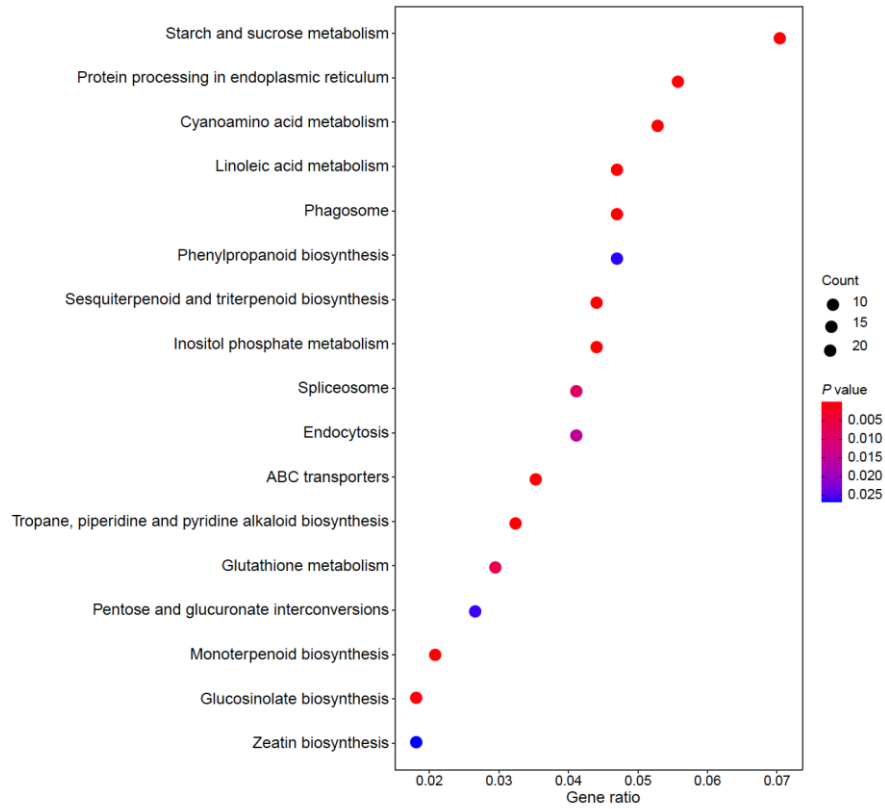

**Supplementary Fig. 5. The KEGG enrichment analyses of 1,396 genes in 230 significantly expanded families of rice bean.** Significance was tested with the two-sided Fisher's exact test. The significant term was the one with  $P$  value  $< 0.05$ .

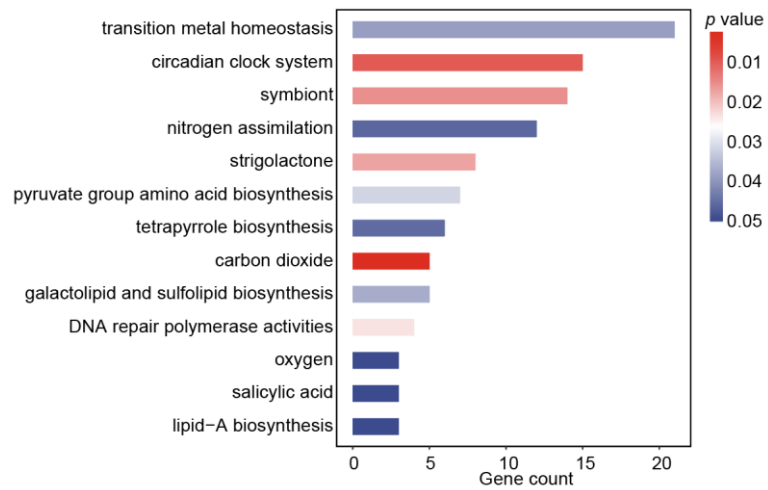

**Supplementary Fig. 6. MapMan enrichment analysis of all the selected genes for the three comparisons (SSA vs. SC, SSA vs. NC, and SC vs. NC).** Significance was tested with the two-sided Fisher's exact test. The significant term was the one with  $P$  value  $< 0.05$ .

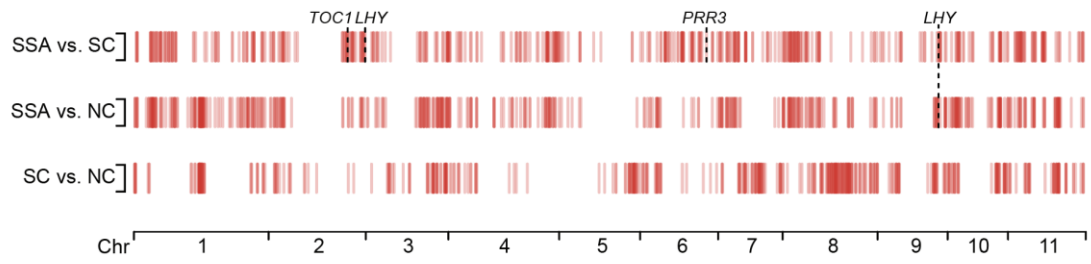

**Supplementary Fig. 7. Genomic divergence signals for the three comparisons (SSA vs. SC, SSA vs. NC, and SC vs. NC) and homologous genes related to “circadian clock system” within these signals.** The red lines represent the diverged genomic signals and the black dashed lines indicate the locations of the homologous genes related to “circadian clock system”.



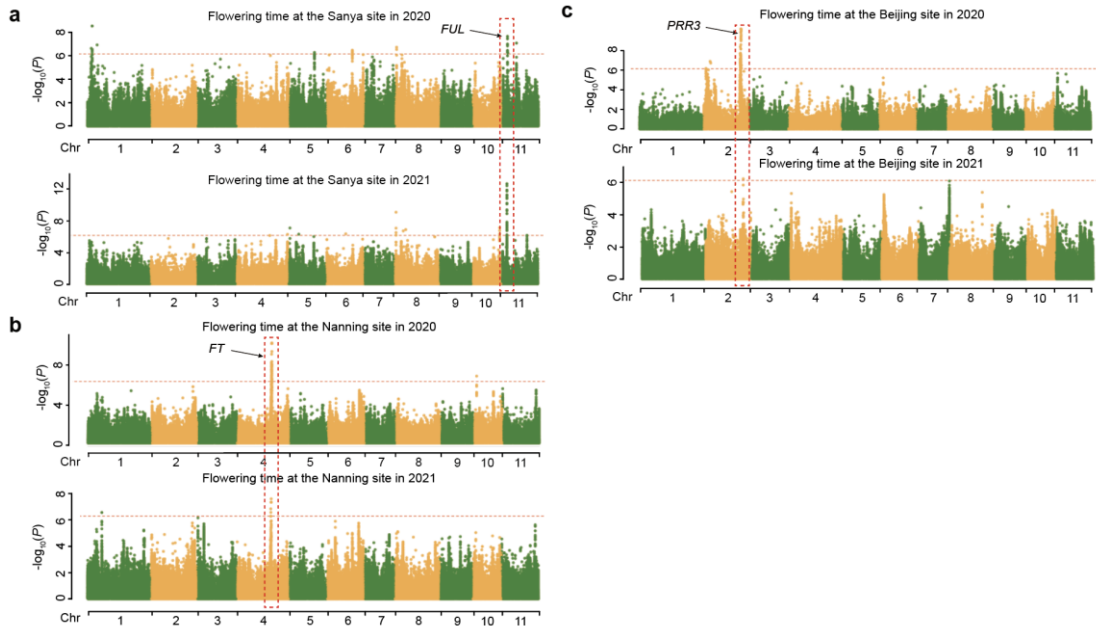

**Supplementary Fig. 8. Manhattan plots of GWAS for flowering-time data measured at the Sanya (a), Nanning (b), and Beijing (c) sites across two years (2020 and 2021). Red horizontal dashed line indicated the Bonferroni-corrected significance thresholds of GWAS ( $\alpha = 1$ ).**

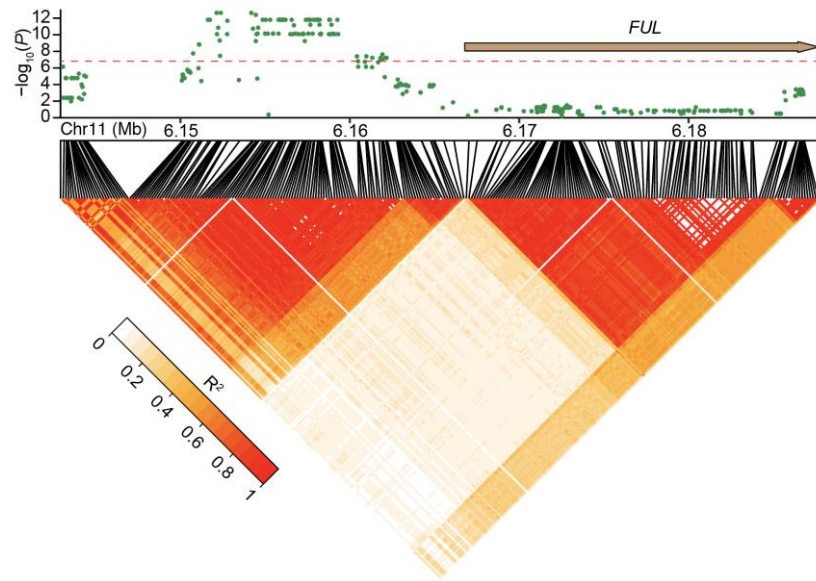

**Supplementary Fig. 9. Local Manhattan plot and pairwise linkage disequilibrium (LD) heat map among SNPs located in the associated region with the flowering time measured in Sanya in 2021. The candidate protein-coding gene *FUL* is shown as colored arrows. Red horizontal dashed line indicated the Bonferroni-corrected significance thresholds of GWAS ( $\alpha = 1$ ).**

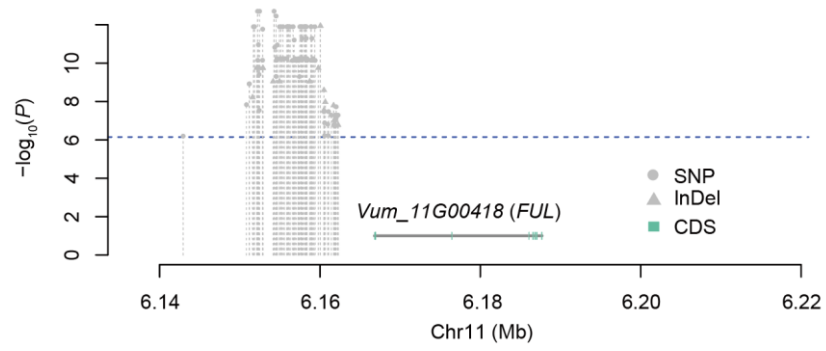

**Supplementary Fig. 10. Local Manhattan plot for SNPs and InDels significantly associated with flowering time at the Sanya site within 30 Kb of the candidate gene *FUL*.** Red horizontal dashed line indicated the Bonferroni-corrected significance thresholds of GWAS ( $\alpha = 1$ ).

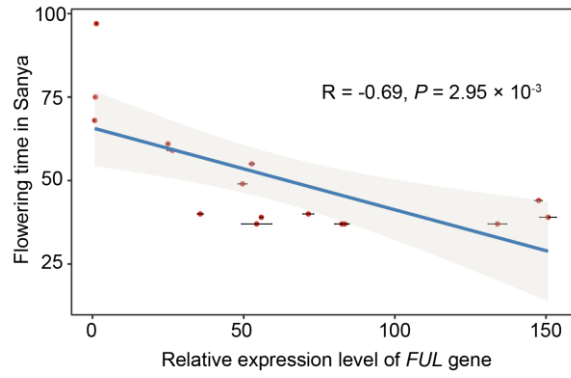

**Supplementary Fig. 11. A significantly negative correlation between flowering time and the *FUL* expression level in newly expanded leaves in a panel of 16 diverse rice bean landraces.** Data are presented as mean  $\pm$  SD. Significance was tested with two-sided Student's t-tests.

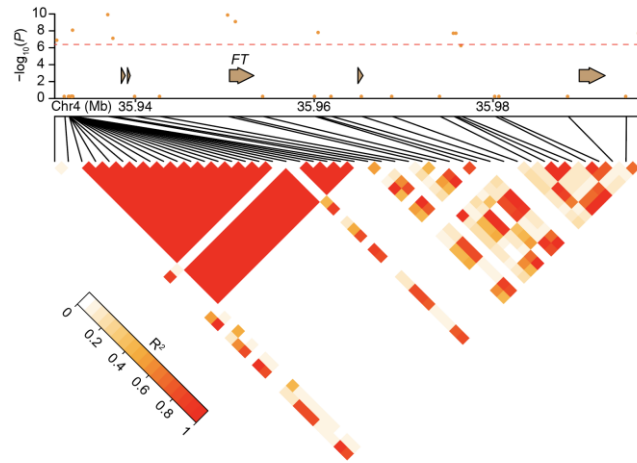

**Supplementary Fig. 12. Local Manhattan plot and pairwise linkage disequilibrium (LD) heat map among SNPs located in the associated region with the flowering time measured in Nanning in 2020. The five protein-coding genes are shown as colored arrows. Red horizontal dashed line indicated the Bonferroni-corrected significance thresholds of GWAS ( $\alpha = 1$ ).**

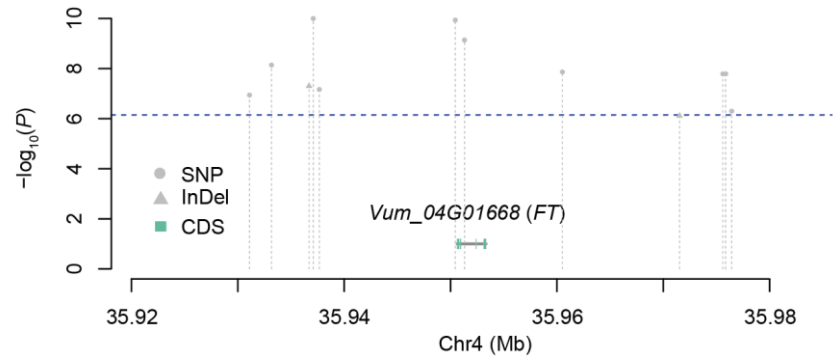

**Supplementary Fig. 13. Local Manhattan plot for SNPs and InDels significantly associated with flowering time at the Nanning site within 30 Kb of the candidate gene *FT*.** Red horizontal dashed line indicated the Bonferroni-corrected significance thresholds of GWAS ( $\alpha = 1$ ).

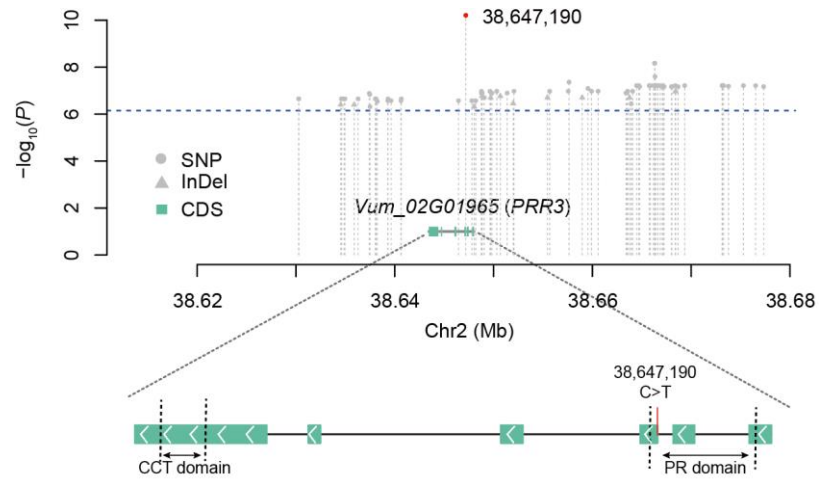

**Supplementary Fig. 14. Local Manhattan plot for SNPs and InDels significantly associated with flowering time at the Beijing site within 30 Kb of the candidate gene *PRR3*.** The linear gene structure displays the CDS region (rectangles), and introns (horizontal solid grey lines). The white arrow indicates the 5' to 3' direction. The red dot and vertical solid lines represent the peak SNP. The dotted lines represented the physical coordinates of the two functional domains (PR, pseudo receiver; CCT, named after the proteins CONSTANS [CO], CO-like, and TOC1, which contain this domain). Red horizontal dashed line indicated the Bonferroni-corrected significance thresholds of GWAS ( $\alpha = 1$ ).

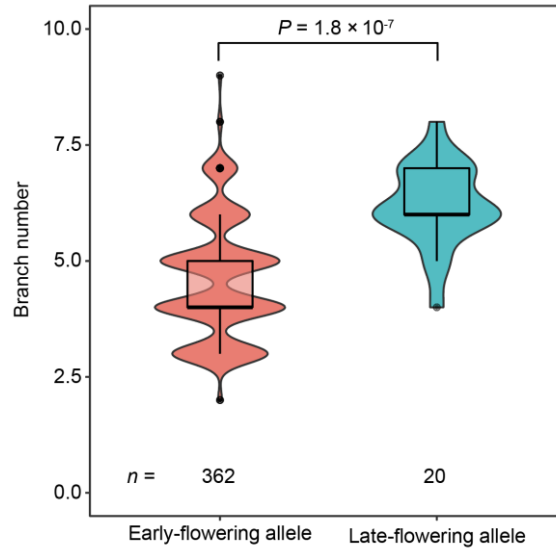

**Supplementary Fig. 15. The branch number distribution showed significant differences among landraces carrying the early-flowering *FUL* allele and those carrying the late-flowering *FUL* allele, respectively.** The significance was tested with two-sided Wilcoxon tests. In the violin plots, central line: median values; bounds of the box: 25th and 75th percentiles; whiskers: 1.5 \* IQR (IQR: the interquartile range between the 25th and 75th percentile). The number (*n*) of landraces carrying each allele is shown below. Source data are provided as a Source Data file.



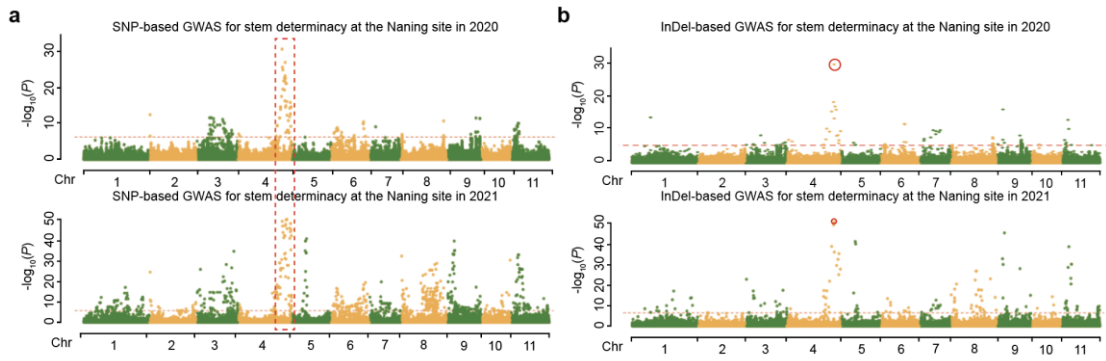

**Supplementary Fig. 16. Manhattan plots of SNP-based (a) and InDel-based (b) GWAS for stem determinacy measured at the Nanning site across two years (2020 and 2021).** The peak InDel (2-nt deletion) is indicated by the red circle. Red horizontal dashed line indicated the Bonferroni-corrected significance thresholds of GWAS ( $\alpha = 1$ ).

Chr4: 47174187

↓

|           |                                                 |                                                   |
|-----------|-------------------------------------------------|---------------------------------------------------|
| Reference | AAGGGAAAAACTCATGGCCATTGTAGACTTGCCTTTTGTATAACTCA | CAGTCATTTTTGTGGTTGTGGTAAAAAGAGTCAAGAACCTCTCCTATGA |
| S102      | AAGGGAAAAACTCATGGCCATTGTAGACTTGCCTTTTGTATAACT-  | CAGTCATTTTTGTGGTGTGGTAAAAAGAGTCAAGAACCTCTCCTATGA  |
| S110      | AAGGGAAAAACTCATGGCCATTGTAGACTTGCCTTTTGTATAACT-  | CAGTCATTTTTGTGGTTGTGGTAAAAAGAGTCAAGAACCTCTCCTATGA |
| S118      | AAGGGAAAAACTCATGGCCATTGTAGACTTGCCTTTTGTATAACT-  | CAGTCATTTTTGTGGTTGTGGTAAAAAGAGTCAAGAACCTCTCCTATGA |
| S130      | AAGGGAAAAACTCATGGCCATTGTAGACTTGCCTTTTGTATAACT-  | CAGTCATTTTTGTGGTTGTGGTAAAAAGAGTCAAGAACCTCTCCTATGA |
| S131      | AAGGGAAAAACTCATGGCCATTGTAGACTTGCCTTTTGTATAACT-  | CAGTCATTTTTGTGGTTGTGGTAAAAAGAGTCAAGAACCTCTCCTATGA |
| S133      | AAGGGAAAAACTCATGGCCATTGTAGACTTGCCTTTTGTATAACT-  | CAGTCATTTTTGTGGTTGTGGTAAAAAGAGTCAAGAACCTCTCCTATGA |
| S134      | AAGGGAAAAACTCATGGCCATTGTAGACTTGCCTTTTGTATAACT-  | CAGTCATTTTTGTGGTTGTGGTAAAAAGAGTCAAGAACCTCTCCTATGA |
| S135      | AAGGGAAAAACTCATGGCCATTGTAGACTTGCCTTTTGTATAACT-  | CAGTCATTTTTGTGGTTGTGGTAAAAAGAGTCAAGAACCTCTCCTATGA |
| S136      | AAGGGAAAAACTCATGGCCATTGTAGACTTGCCTTTTGTATAACT-  | CAGTCATTTTTGTGGTTGTGGTAAAAAGAGTCAAGAACCTCTCCTATGA |
| S137      | AAGGGAAAAACTCATGGCCATTGTAGACTTGCCTTTTGTATAACT-  | CAGTCATTTTTGTGGTTGTGGTAAAAAGAGTCAAGAACCTCTCCTATGA |
| S141      | AAGGGAAAAACTCATGGCCATTGTAGACTTGCCTTTTGTATAACT-  | CAGTCATTTTTGTGGTTGTGGTAAAAAGAGTCAAGAACCTCTCCTATGA |
| S15       | AAGGGAAAAACTCATGGCCATTGTAGACTTGCCTTTTGTATAACT-  | CAGTCATTTTTGTGGTTGTGGTAAAAAGAGTCAAGAACCTCTCCTATGA |
| S231      | AAGGGAAAAACTCATGGCCATTGTAGACTTGCCTTTTGTATAACT-  | CAGTCATTTTTGTGGTTGTGGTAAAAAGAGTCAAGAACCTCTCCTATGA |
| S232      | AAGGGAAAAACTCATGGCCATTGTAGACTTGCCTTTTGTATAACT-  | CAGTCATTTTTGTGGTTGTGGTAAAAAGAGTCAAGAACCTCTCCTATGA |
| S233      | AAGGGAAAAACTCATGGCCATTGTAGACTTGCCTTTTGTATAACT-  | CAGTCATTTTTGTGGTTGTGGTAAAAAGAGTCAAGAACCTCTCCTATGA |
| S234      | AAGGGAAAAACTCATGGCCATTGTAGACTTGCCTTTTGTATAACT-  | CAGTCATTTTTGTGGTTGTGGTAAAAAGAGTCAAGAACCTCTCCTATGA |
| S235      | AAGGGAAAAACTCATGGCCATTGTAGACTTGCCTTTTGTATAACT-  | CAGTCATTTTTGTGGTTGTGGTAAAAAGAGTCAAGAACCTCTCCTATGA |
| S237      | AAGGGAAAAACTCATGGCCATTGTAGACTTGCCTTTTGTATAACT-  | CAGTCATTTTTGTGGTTGTGGTAAAAAGAGTCAAGAACCTCTCCTATGA |
| S238      | AAGGGAAAAACTCATGGCCATTGTAGACTTGCCTTTTGTATAACT-  | CAGTCATTTTTGTGGTTGTGGTAAAAAGAGTCAAGAACCTCTCCTATGA |
| S239      | AAGGGAAAAACTCATGGCCATTGTAGACTTGCCTTTTGTATAACT-  | CAGTCATTTTTGTGGTTGTGGTAAAAAGAGTCAAGAACCTCTCCTATGA |
| S240      | AAGGGAAAAACTCATGGCCATTGTAGACTTGCCTTTTGTATAACT-  | CAGTCATTTTTGTGGTTGTGGTAAAAAGAGTCAAGAACCTCTCCTATGA |
| S241      | AAGGGAAAAACTCATGGCCATTGTAGACTTGCCTTTTGTATAACT-  | CAGTCATTTTTGTGGTTGTGGTAAAAAGAGTCAAGAACCTCTCCTATGA |
| S242      | AAGGGAAAAACTCATGGCCATTGTAGACTTGCCTTTTGTATAACT-  | CAGTCATTTTTGTGGTTGTGGTAAAAAGAGTCAAGAACCTCTCCTATGA |
| S243      | AAGGGAAAAACTCATGGCCATTGTAGACTTGCCTTTTGTATAACT-  | CAGTCATTTTTGTGGTTGTGGTAAAAAGAGTCAAGAACCTCTCCTATGA |
| S244      | AAGGGAAAAACTCATGGCCATTGTAGACTTGCCTTTTGTATAACT-  | CAGTCATTTTTGTGGTTGTGGTAAAAAGAGTCAAGAACCTCTCCTATGA |
| S329      | AAGGGAAAAACTCATGGCCATTGTAGACTTGCCTTTTGTATAACT-  | CAGTCATTTTTGTGGTTGTGGTAAAAAGAGTCAAGAACCTCTCCTATGA |
| S330      | AAGGGAAAAACTCATGGCCATTGTAGACTTGCCTTTTGTATAACT-  | CAGTCATTTTTGTGGTTGTGGTAAAAAGAGTCAAGAACCTCTCCTATGA |
| S353      | AAGGGAAAAACTCATGGCCATTGTAGACTTGCCTTTTGTATAACT-  | CAGTCATTTTTGTGGTTGTGGTAAAAAGAGTCAAGAACCTCTCCTATGA |
| S363      | AAGGGAAAAACTCATGGCCATTGTAGACTTGCCTTTTGTATAACT-  | CAGTCATTTTTGTGGTTGTGGTAAAAAGAGTCAAGAACCTCTCCTATGA |
| S385      | AAGGGAAAAACTCATGGCCATTGTAGACTTGCCTTTTGTATAACT-  | CAGTCATTTTTGTGGTTGTGGTAAAAAGAGTCAAGAACCTCTCCTATGA |
| S388      | AAGGGAAAAACTCATGGCCATTGTAGACTTGCCTTTTGTATAACT-  | CAGTCATTTTTGTGGTTGTGGTAAAAAGAGTCAAGAACCTCTCCTATGA |
| S46       | AAGGGAAAAACTCATGGCCATTGTAGACTTGCCTTTTGTATAACT-  | CAGTCATTTTTGTGGTTGTGGTAAAAAGAGTCAAGAACCTCTCCTATGA |

Supplementary Fig. 17. The verification of the homologous 2-bp deletion on the first exon of the *TFL1* gene in the 32 landraces using Sanger sequencing technology.

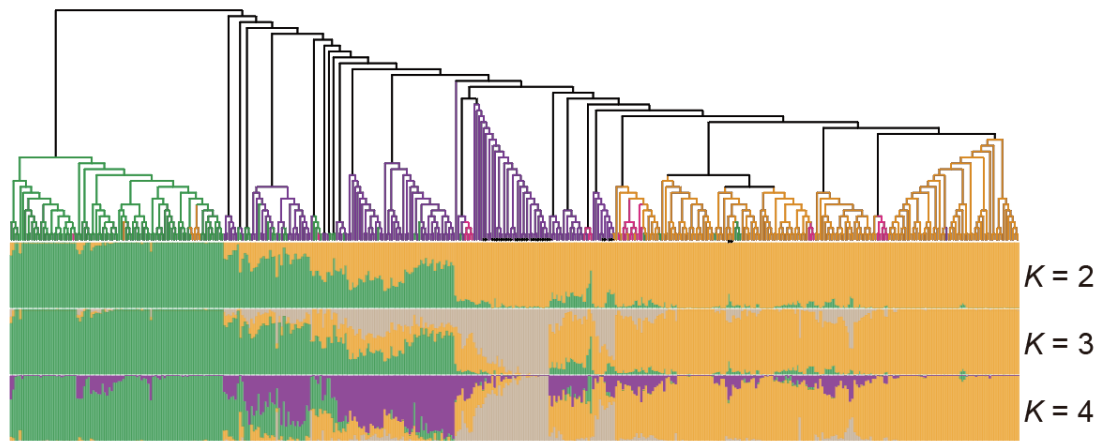

**Supplementary Fig. 18. Phylogenetic tree and model-based clustering ( $K = 2-4$ ) of 440 sequenced landraces.** The landraces with 2-nt deletion in the *TFL1* gene were indicated by the black triangle on the phylogenetic tree.

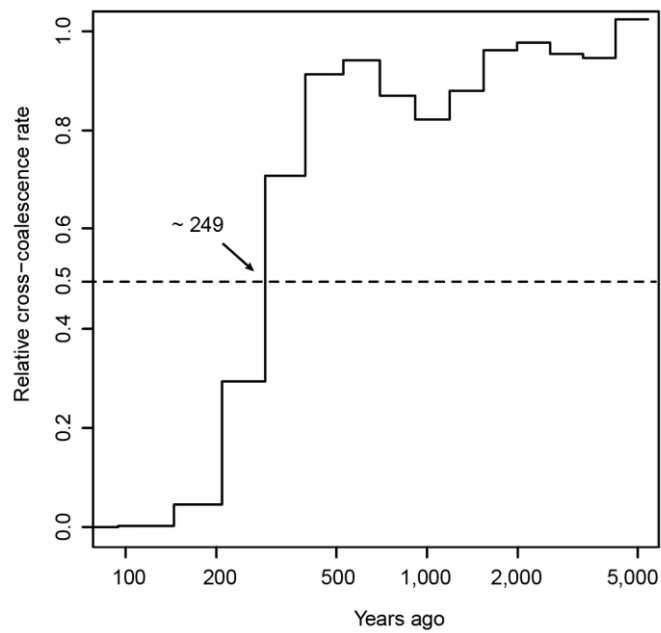

**Supplementary Fig. 19. Relative cross coalescence rate between the 32 landraces carrying homozygous mutation (2-bp deletion) alleles and the other landraces in the SC group.** The Relative cross coalescence rate was estimated using the MSMC2 program. Values close to 1 indicate that the two populations have not yet diverged. Values close to 0 indicate that the populations have fully diverged. The divergence time was determined under a mutation rate  $\mu = 1.5 \times 10^{-8}$  per site per generation when the value was 0.5.

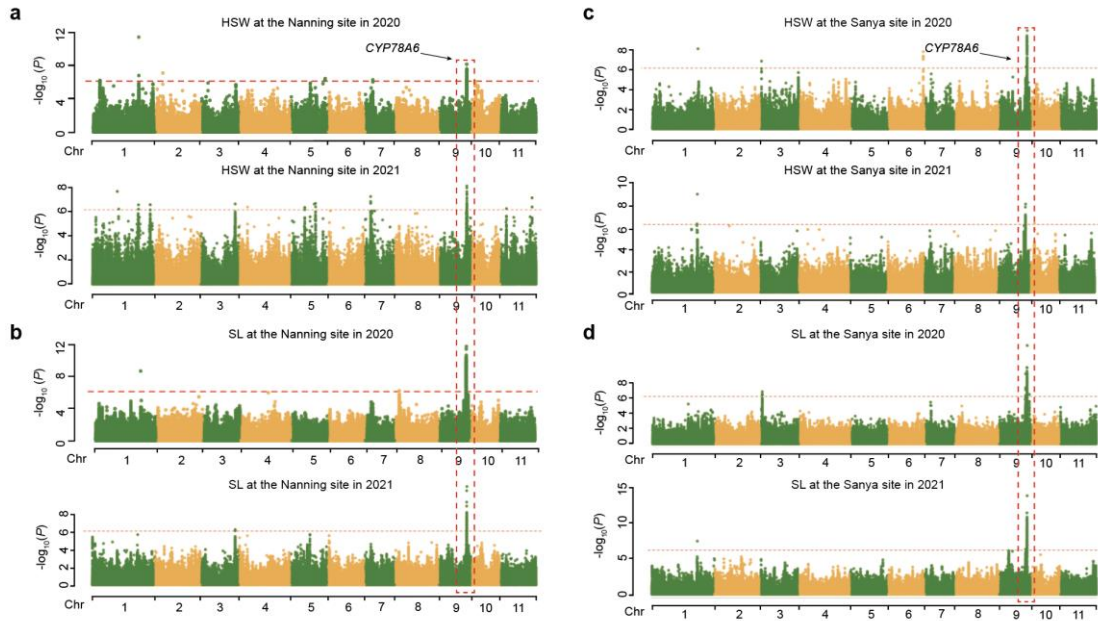

**Supplementary Fig. 20. Manhattan plots of GWAS for seed yield traits measured at the Nanning (a-b) and Sanya (c-d) sites across two years (2020 and 2021). HSW, hundred seed weight; SL, seed length. Red horizontal dashed line indicated the Bonferroni-corrected significance thresholds of GWAS ( $\alpha = 1$ ).**

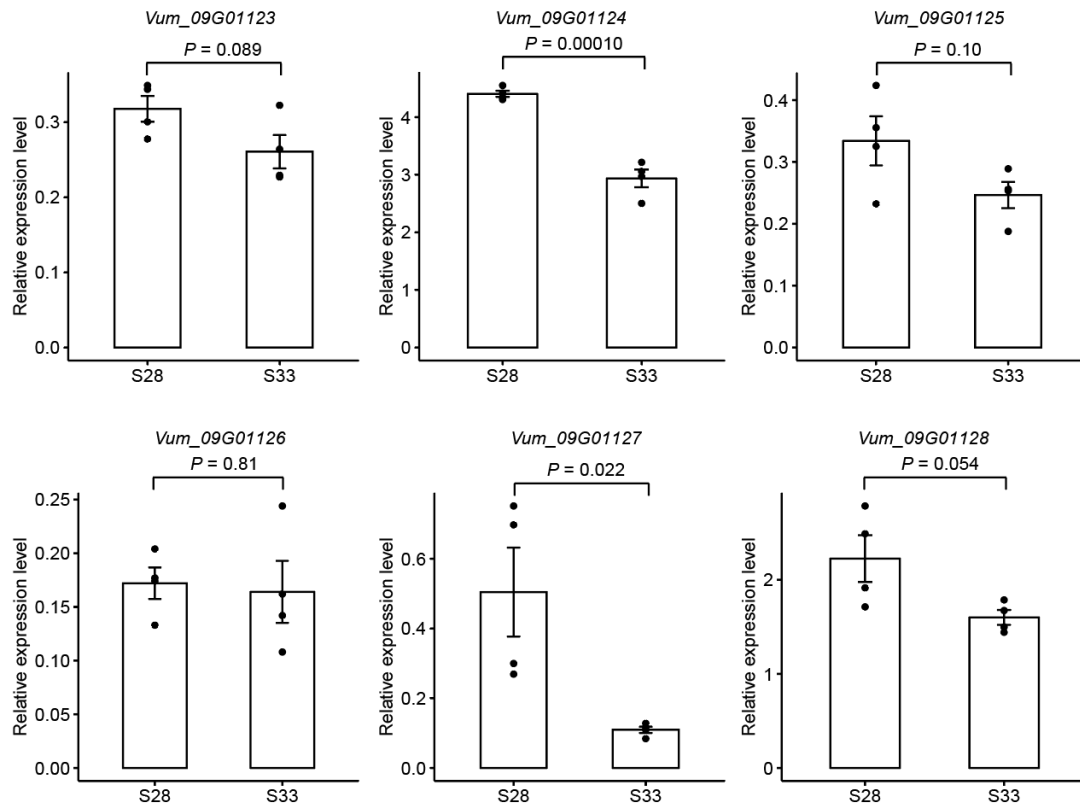

**Supplementary Fig. 21. The expression levels of six candidate genes responsible for the association with seed yield component traits.** The two genes *Vum\_09G01124* and *Vum\_09G01127* was located in the associated region (Chr9: 29,030,437 – 29,126,729) and showed differential expression in the seed tissue at 16 DAP between the long-pod (S28) and short-pod landraces (S33), each with four biological replicates. The significance was assessed using two-sided Student's t-test. The data are shown as mean  $\pm$  SE, and the error bars represent SE. Source data are provided as a Source Data file.

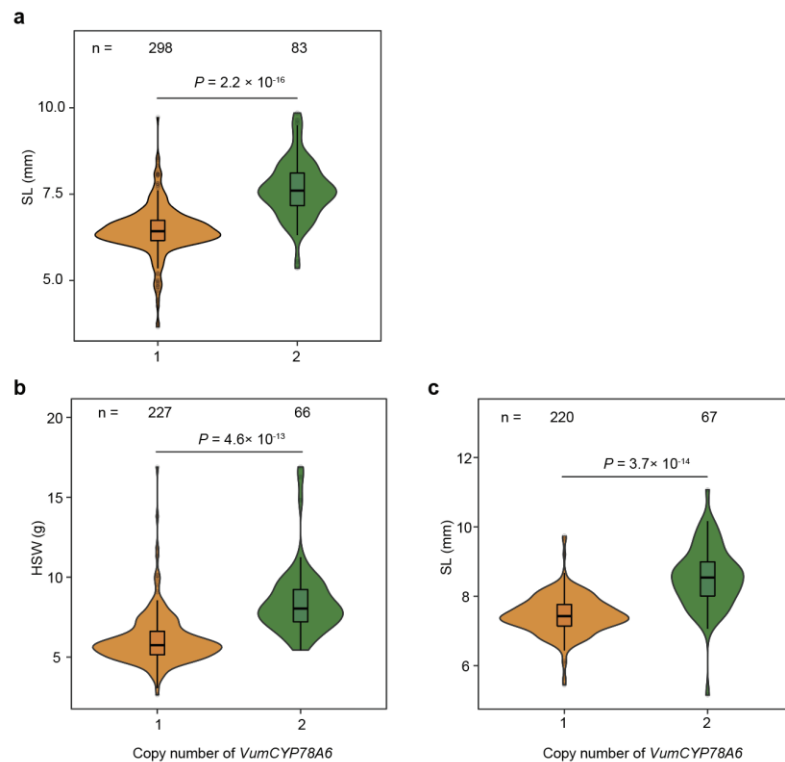

**Supplementary Fig. 22. The comparisons of seed yield component traits measured at the Nanning (a) and Sanya sites (b-c) among landraces with different copy numbers of the *VumCYP78A6* gene.** HSW, hundred seed weight; SL, seed length. The significance was tested using the two-sided Student's *t*-test. The number (*n*) of landraces with different copy numbers was shown above. In the boxplots, the central line represents the median values, the bounds of the box are corresponding to the 25th and 75th percentiles, and the whiskers represent 1.5 \* IQR (the interquartile range between the 25th and 75th percentiles).





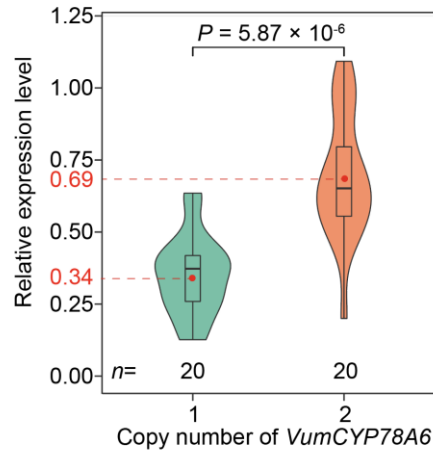

**Supplementary Fig. 24. qPCR analysis of seedlings (14 days after sowing) from 20 landraces with one copy of *VumCYP78A6* and 20 landraces with two copies.** In the violin plots, central line: median values; bounds of box: 25th and 75th percentiles; whiskers: 1.5 \* IQR (IQR: the interquartile range between the 25th and 75th percentile). The red dot represents the average relative expression value. The significance was tested using the two-sided Student's *t*-test. The number (*n*) of landraces carrying different copy numbers is shown below. Source data are provided as a Source Data file.

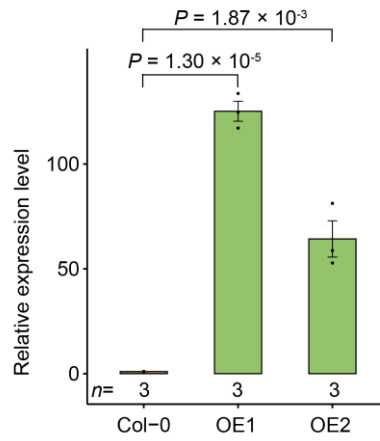

**Supplementary Fig. 25. qRT-PCR measurement of the expression levels of *VumCYP78A6-2* in the leaves of wild type (*Arabidopsis thaliana* Col-0) and two independent *VumCYP78A6-2*-OE transgenic plants (OE1 and OE2).** Significance was tested using two-sided Student's *t*-test. The data are shown as mean ± SE, and the error bars represent SE. The number (*n*) of each independent experiment is shown below. Source data are provided as a Source Data file.

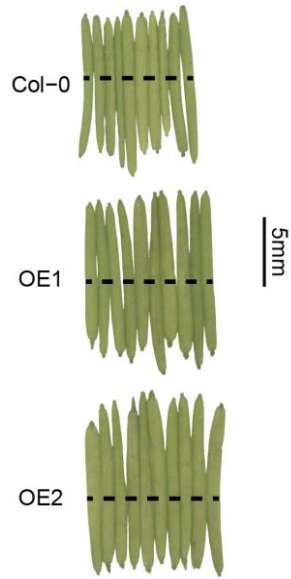

**Supplementary Fig. 26.** The silique morphology of the wild type (*Arabidopsis thaliana* Col-0) and two independent *VumCYP78A6-2-OE* transgenic lines. Siliques from 6-week-old plants are shown. Bar = 5 mm.

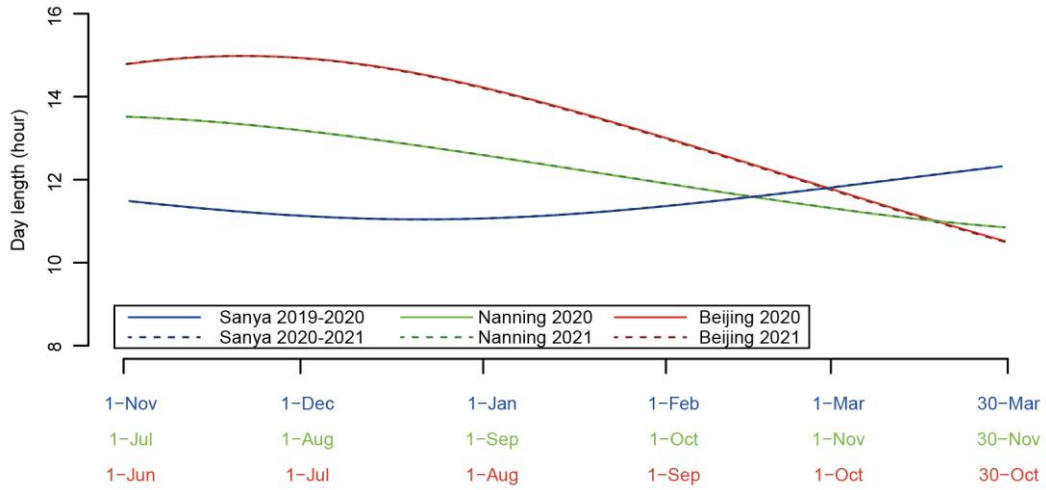

**Supplementary Fig. 27. The day length (hour) per day during the growth period at the Sanya site (18° N) in 2019-2020 and 2020-2021, at the Nanning site (22° N) in 2020 and 2021, and at the Beijing site (40° N) in 2020 and 2021.**

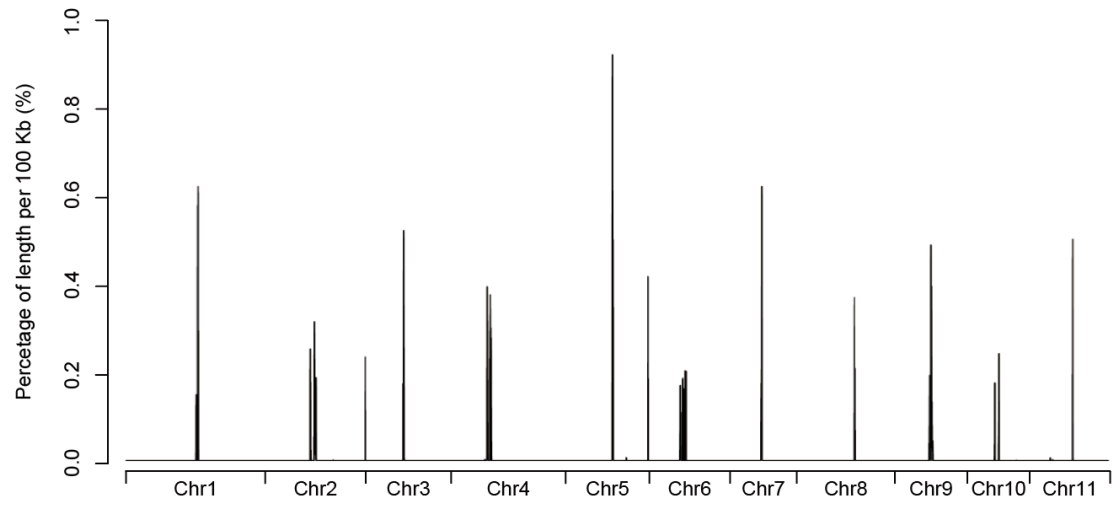

**Supplementary Fig. 28.** The frequency distribution of the 217-bp centromere-specific repeat.

**Supplementary Table 1. Statistics of genome sequencing data for FF25.**

|                         |                  |                 |
|-------------------------|------------------|-----------------|
| <b>PacBio SMRT</b>      | Read number      | 10,994,155      |
|                         | Base number      | 142,946,051,635 |
|                         | N50 length (bp)  | 19475           |
|                         | Depth            | 300.54 ×        |
| <b>Illumina NovaSeq</b> | Read number      | 338,192,988     |
|                         | Base number      | 50,728,948,200  |
|                         | Length (bp)      | 150             |
|                         | Depth            | 106.65 ×        |
| <b>Hi-C</b>             | Read Pair number | 465,992,774     |
|                         | Base number      | 69,898,916,100  |
|                         | Length (bp)      | 150             |
|                         | Depth            | 146.96 ×        |

**Supplementary Table 2. Completeness of the FF25 genome assembly.**

|        | <b>Feature</b>                  | <b>Genome</b> | <b>Protein</b> |
|--------|---------------------------------|---------------|----------------|
| BUSCOs | Complete BUSCOs                 | 2,064 (97.3%) | 2,057 (96.9%)  |
|        | Complete and single-copy BUSCOs | 1,965 (92.6%) | 1,967 (92.7%)  |
|        | Complete and duplicated BUSCOs  | 99 (4.7%)     | 90 (4.2%)      |
|        | Fragmented BUSCOs               | 11 (0.5%)     | 21 (1.0%)      |
|        | Missing BUSCOs                  | 46 (2.2%)     | 43 (2.1%)      |
|        | <b>Total</b>                    | <b>2,121</b>  | <b>2,121</b>   |
| LAI    |                                 | 20.3          | -              |

**Supplementary Table 3. Distributions of protein-coding genes on chromosomes and unanchored contigs.**

| Chromosome           | Gene number     |
|----------------------|-----------------|
| Chr1                 | 4,221           |
| Chr2                 | 2,684           |
| Chr3                 | 2,122           |
| Chr4                 | 3,300           |
| Chr5                 | 2,164           |
| Chr6                 | 1,984           |
| Chr7                 | 1,882           |
| Chr8                 | 2,769           |
| Chr9                 | 1,613           |
| Chr10                | 1,927           |
| Chr11                | 1,764           |
| Contigs              | 306             |
| Total genes anchored | 26,430 (98.86%) |
| Total                | 26,736          |



**Supplementary Table 4. Distributions of transcription factor (TF), noncoding RNA genes, and pseudogenes on chromosomes and unanchored contigs.**

|         | <b>TF</b> | <b>microRNA</b> | <b>rRNA</b> | <b>snoRNA</b> | <b>tRNA</b> | <b>Pseudogenes</b> |
|---------|-----------|-----------------|-------------|---------------|-------------|--------------------|
| Chr1    | 360       | 146             | 0           | 101           | 110         | 1,067              |
| Chr2    | 241       | 135             | 4           | 52            | 51          | 901                |
| Chr3    | 167       | 100             | 33          | 66            | 51          | 886                |
| Chr4    | 259       | 125             | 13          | 77            | 66          | 977                |
| Chr5    | 160       | 109             | 6           | 59            | 54          | 781                |
| Chr6    | 163       | 92              | 1           | 62            | 47          | 1,048              |
| Chr7    | 160       | 57              | 0           | 49            | 44          | 534                |
| Chr8    | 258       | 128             | 0           | 61            | 57          | 742                |
| Chr9    | 122       | 60              | 2           | 38            | 39          | 779                |
| Chr10   | 182       | 62              | 414         | 23            | 44          | 581                |
| Chr11   | 114       | 104             | 1           | 49            | 26          | 1,178              |
| Contigs | 16        | 164             | 84          | 77            | 175         | 161                |
| Genome  | 2,202     | 1,282           | 558         | 714           | 764         | 9,635              |

**Supplementary Table 5. Percentage of the gene with different FPKM ranges in at least one tissue sequenced.**

|          | <b>Gene number</b> | <b>Percentage (%)</b> |
|----------|--------------------|-----------------------|
| FPKM>1   | 22,956             | 85.86                 |
| FPKM>10  | 16,895             | 63.19                 |
| FPKM>100 | 3,912              | 14.63                 |

**Supplementary Table 6. Number of protein-coding genes annotated by five public database.**

|                 | <b>Number</b> | <b>Percentage (%)</b> |
|-----------------|---------------|-----------------------|
| nr              | 25,990        | 97.21                 |
| InterPro        | 21,160        | 79.14                 |
| Pfam            | 20,424        | 76.39                 |
| GO              | 15,610        | 58.39                 |
| KEGG            | 2,041         | 7.63                  |
| Total annotated | 26,061        | 97.48                 |

**Supplementary Table 7. Summary statistics of syntenic blocks and genes between the Vum genome and its closely related *Vigna* species.**

| Species in <i>Vigna</i> genus                         | Van           | Vst           | Vra           | Vun           |
|-------------------------------------------------------|---------------|---------------|---------------|---------------|
| Syntenic block number                                 | 639           | 714           | 831           | 803           |
| Number and percentage of syntenic genes in Vum genome | 20,985/79.40% | 19,459/73.62% | 17,980/68.03% | 19,990/75.63% |

*V. angularis*, Van; *V. stipulacea*, Vst; *V. radiata*, Vra; *V. unguiculate*, Vun

**Supplementary Table 8. Summary of functional annotations for SNPs and InDels.**

| <b>Functional annotation</b> | <b>Number</b> |
|------------------------------|---------------|
| <b>SNPs</b>                  |               |
| intergenic                   | 6,406,888     |
| exonic                       | 748,590       |
| intronic                     | 1,935,147     |
| upstream                     | 747,199       |
| downstream                   | 721,248       |
| splicing                     | 1,086         |
| synonymous                   | 740,718       |
| nonsynonymous                | 351,272       |
| stopgain                     | 4,200         |
| stoploss                     | 404           |
| <b>InDels</b>                |               |
| intergenic                   | 1,753,129     |
| exonic                       | 36,934        |
| intronic                     | 465,147       |
| upstream                     | 253,788       |
| downstream                   | 244,181       |
| splicing                     | 1,246         |
| frameshift                   | 19,694        |
| nonframeshift                | 15,530        |
| stopgain                     | 1,038         |
| stoploss                     | 97            |

**Supplementary Table 9. GWAS QTLs detected across two years (2020 and 2021).**

| Trait            | Site    | QTL                        | Years <sup>a</sup> | PVE (%) | Candidate gene             |
|------------------|---------|----------------------------|--------------------|---------|----------------------------|
| Flowering time   | Sanya   | Chr8:1,909,300-1,919,793   | 2                  | 10.57   | -                          |
|                  |         | Chr11:6,142,933-6,162,249  | 2                  | 14.86   | <i>Vum_11G00418 (FUL)</i>  |
|                  | Nanning | Chr4:35,931,101-35,996,258 | 2                  | 8.23    | <i>Vum_04G01668 (FT)</i>   |
|                  | Beijing | Chr2:38,647,190-38,647,190 | 2                  | 17.30   | <i>Vum_02G01965 (PRR3)</i> |
| Stem determinacy | Nanning | Chr3:12,535,769-16,852,788 | 2                  | 8.69    | -                          |
|                  |         | Chr4:42,022,544-54,020,700 | 2                  | 41.43   | <i>Vum_04G02513 (TFL1)</i> |
|                  |         | Chr5:13,477,451-13,789,216 | 2                  | 32.19   | -                          |
|                  |         | Chr6:2,759,250-6,161,777   | 2                  | 12.42   | -                          |
|                  |         | Chr7:18,729,386-20,781,885 | 2                  | 8.02    | -                          |
|                  |         | Chr9:28,394,569-28,697,545 | 2                  | 8.24    | -                          |
|                  |         | Chr11:5,078,886-15,461,758 | 2                  | 24.72   | -                          |
| HGW              | Sanya   | Chr9:29,081,975-29,126,729 | 2                  | 8.88    | <i>Vum_09G01129 &amp;</i>  |
|                  | Nanning | Chr9:29,030,437-29,126,729 | 2                  | 15.74   | <i>Vum_09G01130</i>        |
| Seed length      | Sanya   | Chr9:29,030,437-29,126,729 | 2                  | 11.39   | <i>(VumCYP78A6-1 &amp;</i> |
|                  | Nanning | Chr9:29,030,437-29,126,729 | 2                  | 16.17   | <i>VumCYP78A6-2)</i>       |

<sup>a</sup> Number of years in which the QTL was detected.

**Supplementary Table 10. AIC (akaike information criteria) value of five different genetic models used in the association analysis of the alleles associated with flowering-time data measured in two years at the three distinct sites.**

| Alleles     | Year | AIC         |          |           |               |          |
|-------------|------|-------------|----------|-----------|---------------|----------|
|             |      | Co-dominant | Dominant | Recessive | Over-dominant | Additive |
| <i>FUL</i>  | 2020 | -147.20     | -136.30  | -120.10   | -35.70        | -149.06  |
|             | 2021 | -169.10     | -166.50  | -146.80   | -92.10        | -169.82  |
| <i>FT</i>   | 2020 | -8.00       | -9.50    | 32.10     | 78.00         | -2.32    |
|             | 2021 | 52.10       | 50.20    | 93.40     | 116.70        | 61.50    |
| <i>PRR3</i> | 2020 | -351.00     | -347.70  | -340.20   | -269.10       | -352.80  |
|             | 2021 | -356.00     | -352.20  | -340.50   | -272.50       | -357.48  |

**Supplementary Table 11. The position and lengths of the potential centromere.**

| Chr | Length (bp) | Centromere |            |             |                |
|-----|-------------|------------|------------|-------------|----------------|
|     |             | Start (bp) | End (bp)   | Length (Mb) | Number of gaps |
| 1   | 65,796,979  | 33,160,000 | 34,360,000 | 1.20        | 2              |
| 2   | 47,516,185  | 21,420,000 | 24,330,000 | 2.91        | 3              |
| 3   | 40,359,536  | 17,800,000 | 18,480,000 | 0.68        | 1              |
| 4   | 54,125,813  | 17,210,000 | 19,520,000 | 2.31        | 2              |
| 5   | 39,577,938  | 22,350,000 | 23,060,000 | 0.71        | 5              |
| 6   | 38,145,303  | 14,830,000 | 17,900,000 | 3.07        | 2              |
| 7   | 31,513,027  | 15,040,000 | 15,710,000 | 0.67        | 1              |
| 8   | 46,389,798  | 27,740,000 | 28,290,000 | 0.55        | 1              |
| 9   | 34,248,148  | 16,950,000 | 18,780,000 | 1.83        | 1              |
| 10  | 29,464,087  | 13,510,000 | 15,910,000 | 2.40        | 1              |
| 11  | 38,052,607  | 21,040,000 | 21,330,000 | 0.29        | 1              |



**Supplementary Table 12. Primers used in this study.**

| <b>Primer ID</b> | <b>Primer sequences (5'-3')</b>                                          | <b>Purpose</b>                                                                                         |
|------------------|--------------------------------------------------------------------------|--------------------------------------------------------------------------------------------------------|
| TFL1             | Forward:<br>TCTCTCAGATAAGGGTCACT<br>Reverse:<br>CCTCGGTTTCACTCTCTAAA     | Verification for the 2-bp InDel in gene <i>Vum_04G02513 (TFL1)</i>                                     |
| qACT             | Forward:<br>CCCCGAAGAACACCCTGTAC<br>Reverse:<br>ACCGCCTGAATTGCCACATA     | qRT-PCR for gene <i>Vum_05G00112 (ACTIN)</i>                                                           |
| qFUL             | Forward:<br>TGTGATGCTCAAGTCGCACT<br>Reverse:<br>CCTATGTGGGCGTGTCTCTC     | qRT-PCR for gene <i>Vum_11G00418 (FUL)</i>                                                             |
| qVumCYP78A6      | Forward:<br>TTGGCCATAACTGATACCAC<br>Reverse:<br>ACAGAAAACCTCGTTCTCCAA    | qRT-PCR for tandemly duplicated gene <i>VumCYP78A6</i> ( <i>Vum_09G01129</i> and <i>Vum_09G01130</i> ) |
| VumCYP78A6       | Forward:<br>ATGACAACGCACATTGATAACCT<br>Reverse:<br>TTAAGGGCTTAGTCCACGCCT | Gene cloning for gene <i>VumCYP78A6</i> used in Arabidopsis transformation experiment                  |
