# Supplementary material for: Genomic analyses of rice bean landraces reveal adaptation and yield related loci to accelerate breeding
Source: PubMed Central journal article supplement (PMC9523027; doi:10.1038/s41467-022-33515-2), 2022-09-29
Supplement: 41467_2022_33515_MOESM3_ESM.pdf [file 41467_2022_33515_MOESM3_ESM.pdf]

### **Description of Additional Supplementary Files**

File Name: Supplementary Data 1

Description: Protein coding genes in the expanded gene family of rice bean genome.

File Name: Supplementary Data 2

Description: Statistics of repeat sequences in rice bean genome.

File Name: Supplementary Data 3

Description: Summary of re-sequencing data of 440 rice bean landraces.

File Name: Supplementary Data 4

Description: Protein coding genes within the selective sweep regions in the three comparisons of SSA vs. SC, SSA vs. NC, and SC vs. NC.

File Name: Supplementary Data 5

Description: The information of QTL regions and peak SNP/InDel with its PVE value.

File Name: Supplementary Data 6

Description: The information of candidate genes overlapping with the most significant associated signal of flowering time at the Nanning site.

File Name: Supplementary Data 7

Description: The information of candidate genes overlapping with the most significant associated signal of seed yield component traits.
